# Supplementary material
Source: Springer Nature journal article supplement (https://www.springermedizin.de/resource/supplementary/12936_2012_2234_MOESM2_ESM.pdf/9542674)

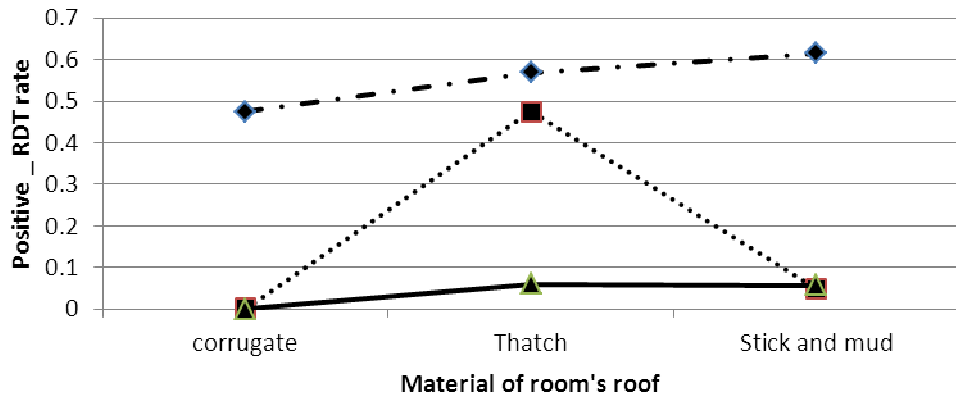

—◆— Unprotected water    ...■... Protected water    —▲— Tap

Supplement: MOESM2 [file 9542674]
